# Supplementary material
Source: Royal Society of Chemistry journal article supplement (doi:10.1039/d6gc00104a)
Supplement: d6gc00104a1.pdf [file d6gc00104a1.pdf]

## **Supporting Information**

**Ammonium-Salt-Assisted Post Loading: A Cost-Effective Route to High-Performance Co–N–C with Enriched Active Sites in Surface for Nitroarene Hydrogenation**

## 1. Experimental section

### 1.1 General Information

Cobalt(II) chloride hexahydrate ( $\text{CoCl}_2 \cdot 6\text{H}_2\text{O}$ ) and melamine ( $\text{C}_3\text{H}_6\text{N}_6$ ) were purchased from Innochem. Ammonium salt was obtained from Aladdin, and nitric acid from McLean. Methanol for chromatography was purchased from Energy Chemicals, ethanol from Aladdin, and activated carbon was supplied by Sinopec Catalyst Co., Ltd. All nitro substrates were purchased from chemical companies, including Aladdin, Innochem, Sigma-Aldrich, and Energy Chemicals. All experiments used deionized water. All chemicals were of analytical grade and used directly without further purification.

### 1.2 Catalyst Characterization

X-ray diffraction (XRD) data were collected on a Rigaku Ultima IV diffractometer with Cu K $\alpha$  ( $k = 1.5418 \text{ \AA}$ ) radiation (50 kV, 40 mA) (Rigaku, Japan). X-ray photoelectron spectra (XPS) were recorded on a Thermo Scientific K-Alpha+ system (Thermo Scientific, USA). Transmission electron microscopy (TEM) images were obtained with an instrument FEI Talos F200S (FEI, USA).  $\text{N}_2$  adsorption-desorption isotherms were measured by static  $\text{N}_2$  physisorption at 77 K with a Micromeritics ASAP 2020 surface area and porosity analyzer (Micromeritics, USA). Raman spectra were measured by using a confocal Raman microscope (Renishaw, UK) equipped with a He-Ne laser ( $\lambda = 532 \text{ nm}$ ). Elemental contents are measured on an AVIO 200 (Perkin Elmer, USA) using inductively coupled plasma optical emission spectrometry (ICP-OES). The conversion and selectivity of the hydrogenation reaction of nitro compounds were determined by high-performance liquid chromatography (HPLC) (Shimadzu, LC-20AD, C18 column) and gas chromatography (GC) (FID detector, GC9790PLUS, crosslinked capillary HP-5 column). The X-ray absorption fine structure (XAFS) spectra (Co K-edge) and X-ray absorption near edge structure (XANES) spectra (Co K-edge) were obtained at beamline BL01C1 at the National Synchrotron Radiation Research Center (NSRRC), Taiwan. Co foil and CoO were used as reference samples. The data was analyzed with Athena and Artemis and included in the Demeter package.

### 1.3 Catalytic performance test

The hydrogenation performance of the catalyst is evaluated in a Teflon-lined stainless-steel autoclave. A specific quantity of nitro compounds, reaction solvents, and catalysts is introduced into the reactor. Subsequently, the reactor is purged with high-purity hydrogen and then pressurized to a predetermined level. The resulting products are then analyzed using HPLC or GC.

The conversion (Con.) and selectivity (Sel.) are defined as follows.

$$\text{Con.} = \frac{\text{moles of substrate reacted}}{\text{moles of substrate}} \times 100 \quad (\text{S1})$$

$$\text{Sel.} = \frac{\text{moles of aniline}}{\text{moles of substrate reacted}} \times 100 \quad (\text{S2})$$

**General procedure for the hydrogenation of nitroarenes:** Substrate (1.26 mmol), catalysts (20 mg), 10 ml of MeOH/ $\text{H}_2\text{O}$  (V:V, 19:1) were added into a 50 ml Teflon-lined stainless autoclave. The mixture was heated to 80 °C under 5 bar  $\text{H}_2$  pressure. After 1.5-3 h, the reactant filtrate was analyzed by HPLC or GC.

**Procedure for catalyst recycling:** A catalyst (200 mg), p-chloronitrobenzene (12.6 mmol), and 200 mL of a MeOH/ $\text{H}_2\text{O}$  (V:V, 19:1) were placed in a 500 mL autoclave. The reaction was carried out at 110 °C under 10 bar of  $\text{H}_2$  for 2 hours. Upon completion, the catalyst was separated by centrifugation, washed with alcohol, and dried under a vacuum to prepare it for further testing.

**Procedure for catalyst regeneration:** The catalyst was treated at 500 °C under a  $\text{H}_2/\text{Ar}$  atmosphere (10%  $\text{H}_2$  by volume) for 1 hour.

**H-D isotope dynamics evaluation:** Kinetic isotope effects were studied using nitrobenzene hydrogenation as a model reaction, with  $\text{H}_2$  or  $\text{D}_2$  as hydrogen donors. The amount of Co/NC-AM catalyst was kept at 20 mg, keeping  $\text{H}_2/\text{D}_2$  pressure of 5 bar, and the reactants were detected by High-performance liquid chromatography (HPLC).

### 1.4 Cost Accounting

The detailed cost calculation per ton of catalyst is as follows: Raw-material cost for Co/NC-AM. According to market research, the prices of cobalt(II) chloride hexahydrate ( $\text{CoCl}_2 \cdot 6\text{H}_2\text{O}$ ), Ammonium-Salt, activated carbon (C), melamine ( $\text{C}_3\text{H}_6\text{N}_6$ ) are  $\$6320 \text{ t}^{-1}$ ,  $\$702 \text{ t}^{-1}$ ,  $\$2809 \text{ t}^{-1}$ ,  $\$562 \text{ t}^{-1}$ , and  $\$562 \text{ t}^{-1}$ , respectively. The yield for preparing NC from activated carbon and melamine is 50%, while the yield for loading  $\text{CoCl}_2 \cdot 6\text{H}_2\text{O}$  onto NC is 76%.

## 2. Figures and tables

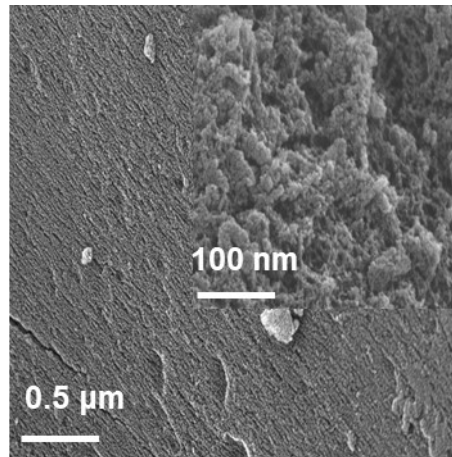

Figure S1. SEM of Co/NC-AM.

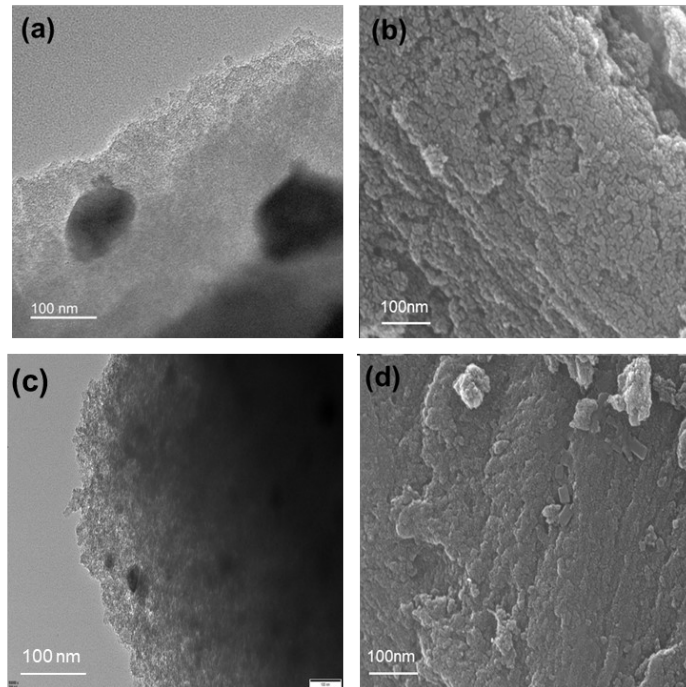

Figure S2. (a) TEM and (b) SEM of Co/NC-ISP; (c) TEM and (d) SEM of Co/NC.

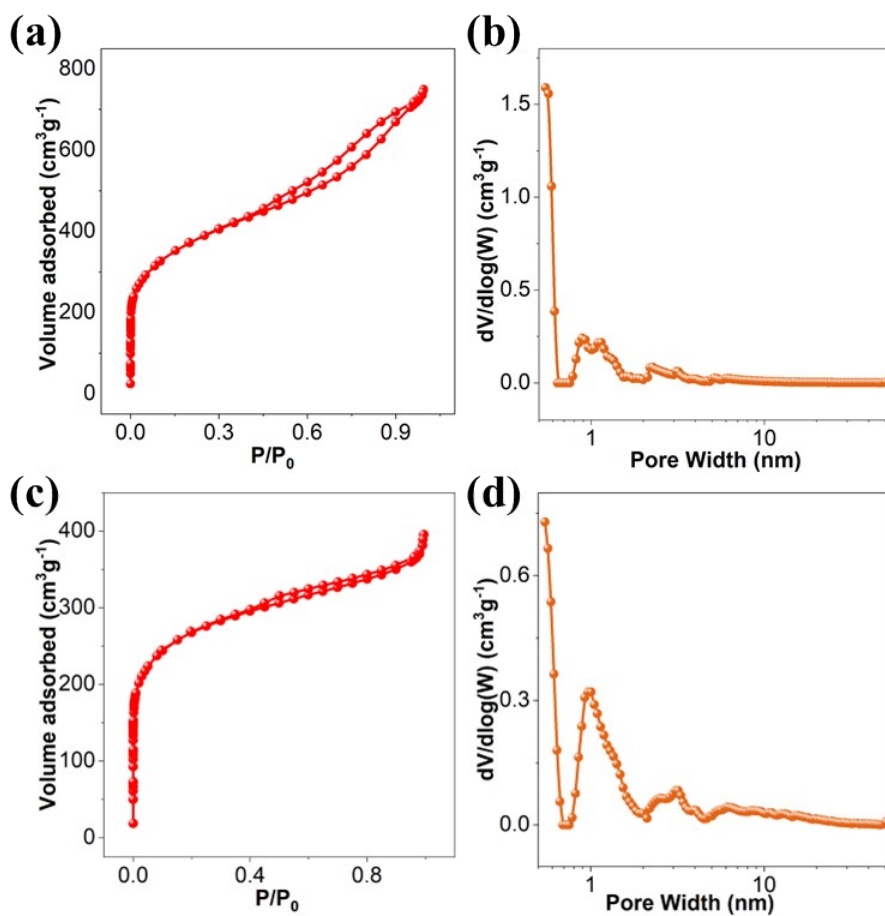

**Figure S3.** (a) N<sub>2</sub> sorption isotherms and (b) pore size distributions of Co/NC; (c) N<sub>2</sub> sorption isotherms and (d) pore size distributions of Co/NC-AM.

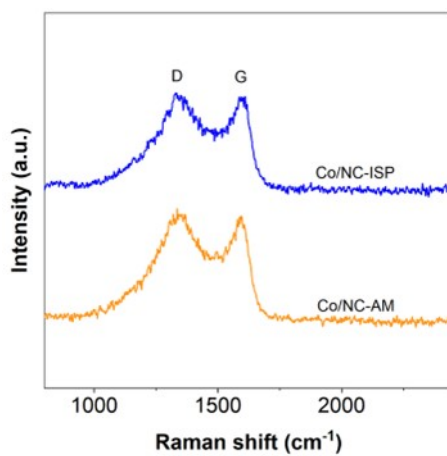

**Figure S4.** Raman spectra of different catalysts.

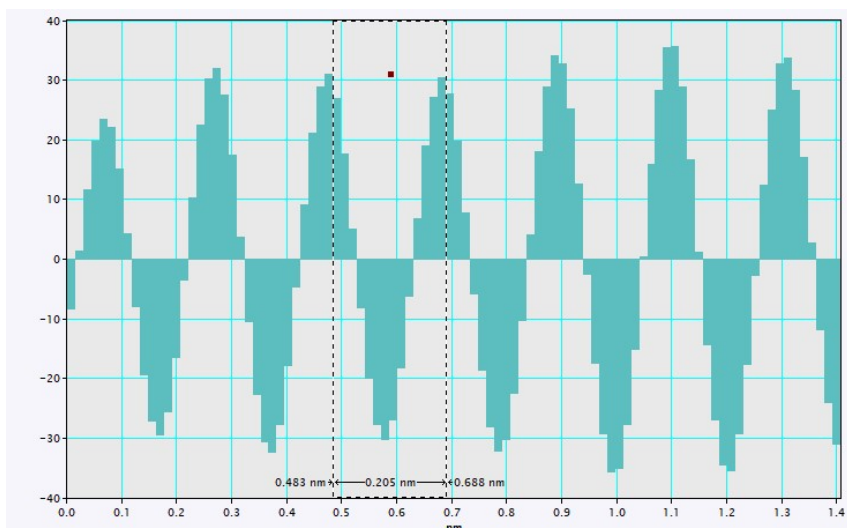

**Figure S5.** The lattice distance of Co/NC-AM processed from Digital Micrograph.

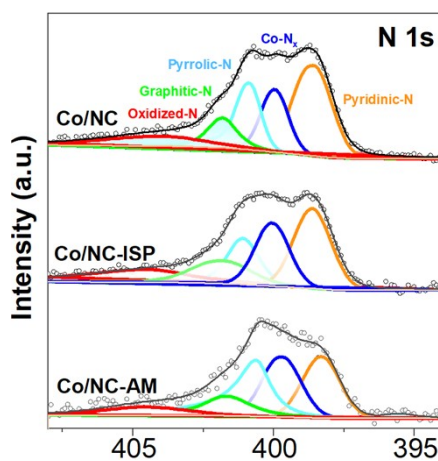

**Figure S6.** High-resolution N 1s XPS spectra of Co/NC-AM, Co/NC-ISP, and Co/NC-AM-AL catalysts.

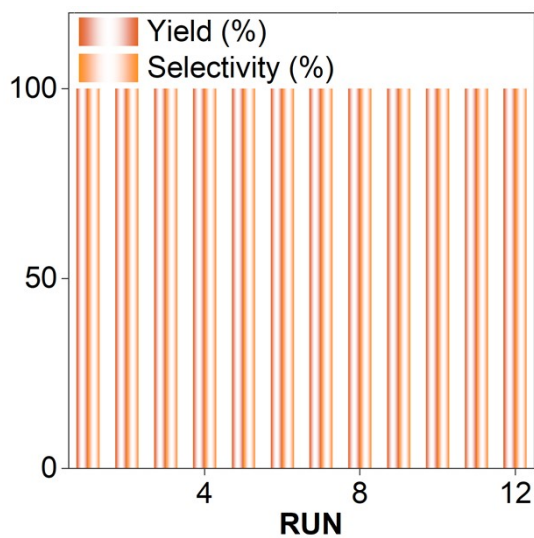

**Figure S7.** Recycling results of the Co/NC-AM catalyst. Reaction condition: 200 mg catalyst, 12.6 mmol nitrobenzene, 10 mL solvent( $\text{H}_2\text{O}$ : MeOH=1:19,v/v), 110 °C, 10 bar  $\text{H}_2$ , 2 h.

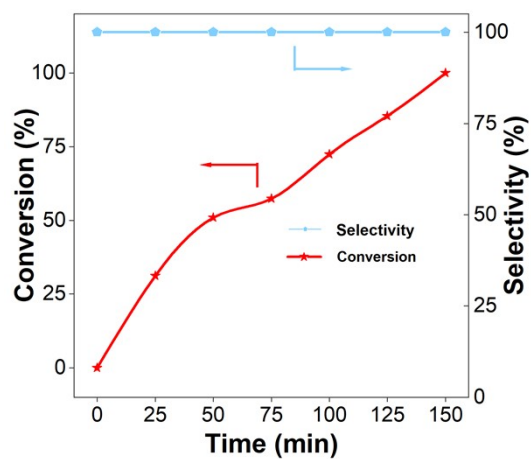

**Figure S8.** Kinetic curves of the Co/NC-AM catalyst. Reaction condition: 20 mg catalyst, 1.26 mmol nitrobenzene, 10 mL solvent (H<sub>2</sub>O: MeOH=1:19,v/v), 80 °C, 5 bar H<sub>2</sub>, 2.5 h.

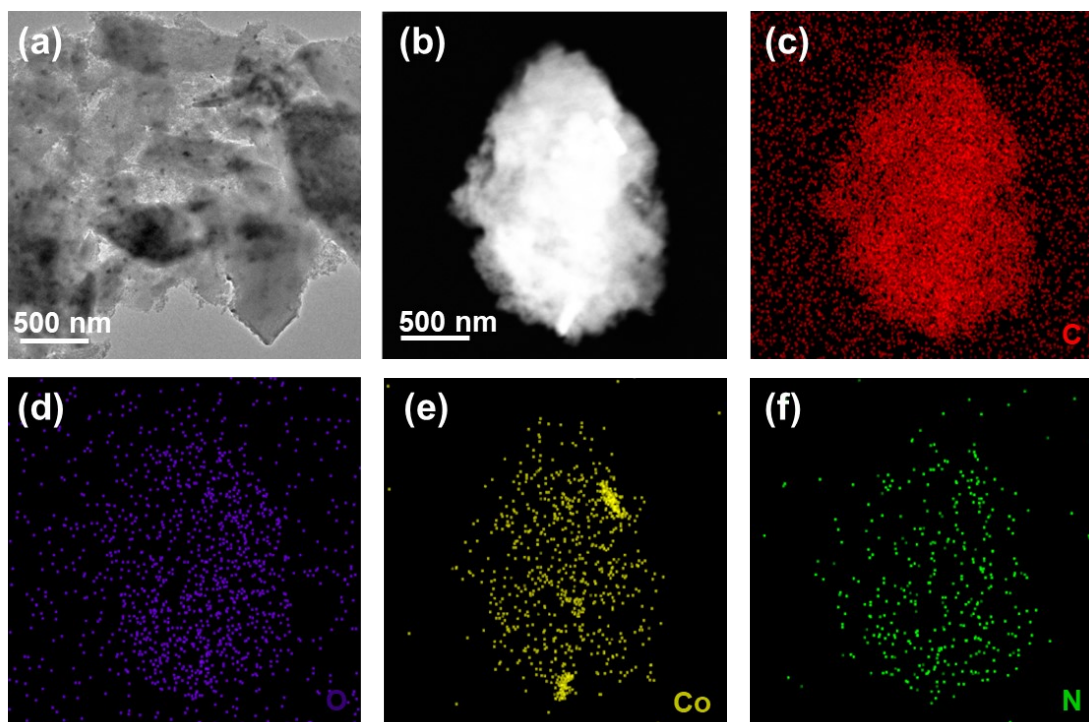

**Figure S9.** TEM images of the Co/NC-AM catalyst after cycling.

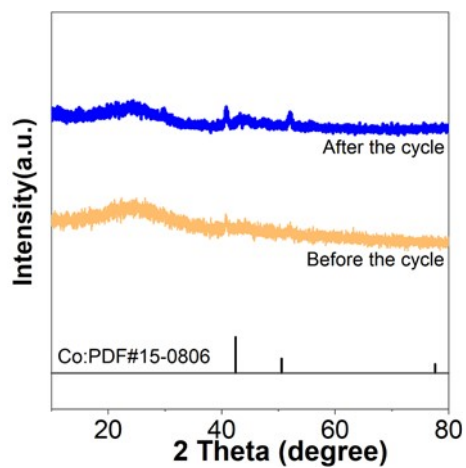

**Figure S10.** XRD patterns of the Co/NC-AM catalyst before and after cycling.

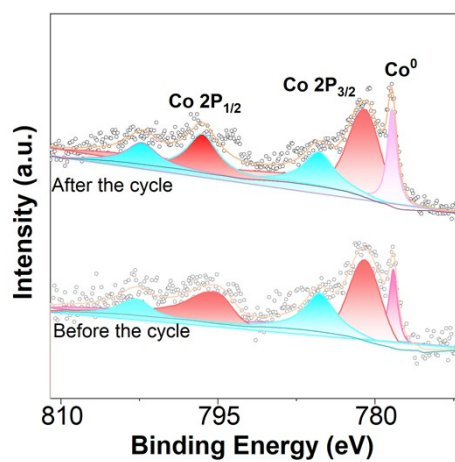

**Figure S11.** XPS patterns of the Co/NC-AM catalyst before and after cycling

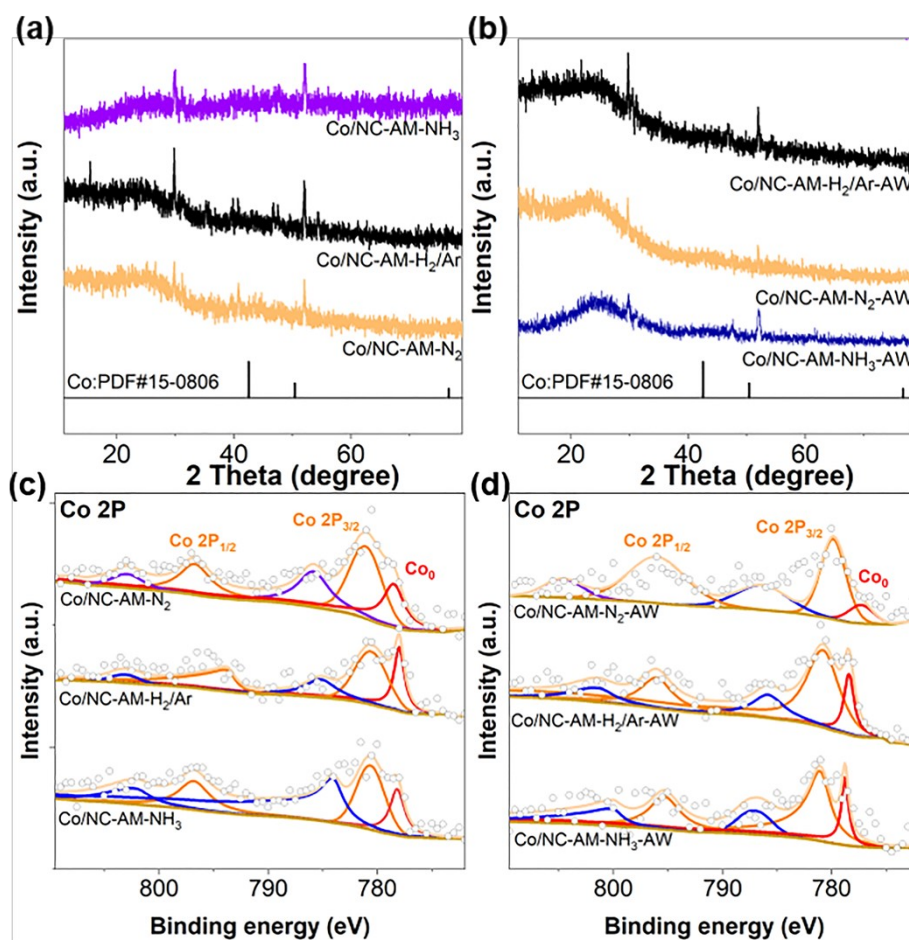

**Figure S12.** (a) and (b) XRD patterns of catalysts prepared under different atmospheres. (c) and (d) XPS patterns of catalysts prepared under different atmospheres.

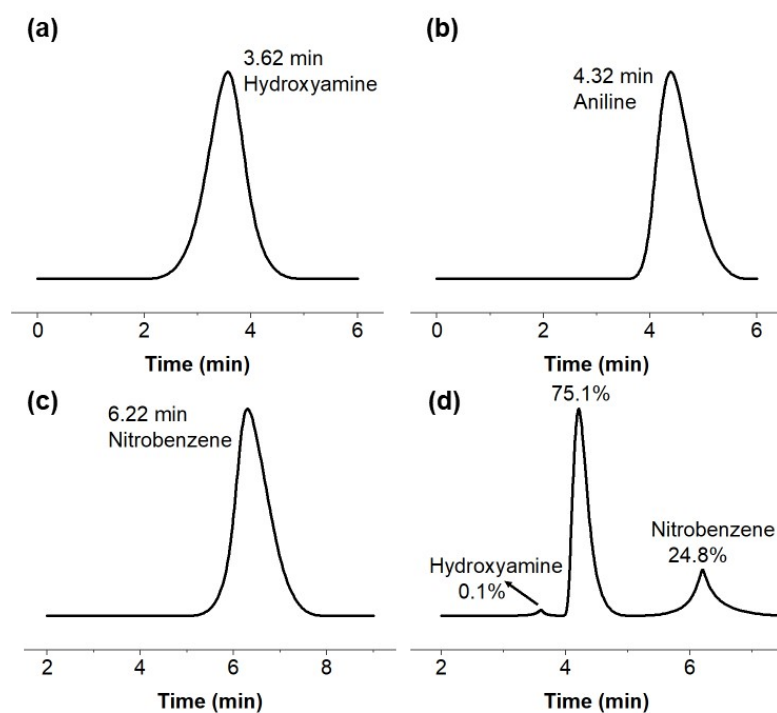

**Figure S13.** (a) Hydroxylamine detection chromatogram obtained by gas chromatography;(b) Aniline detection chromatogram obtained by gas chromatography; (c) Nitrobenzene detection chromatogram obtained by gas chromatography; (d) GC chromatogram of the products from nitrobenzene hydrogenation catalyzed by Co/NC-AM.

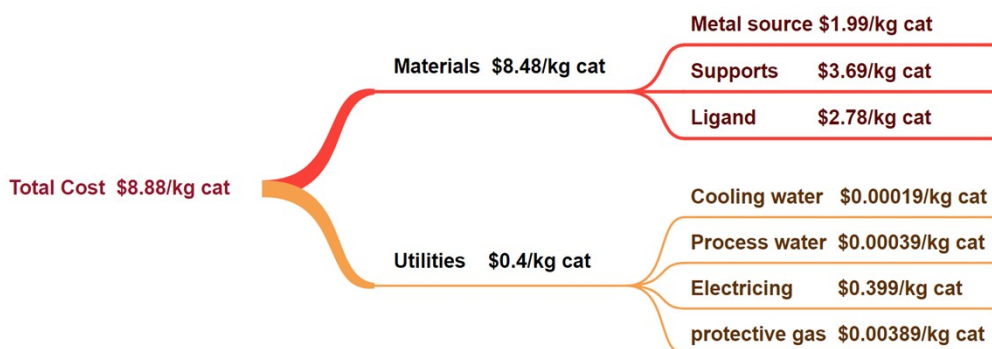

**Figure S14.** Cost Accounting by “CatCost”.

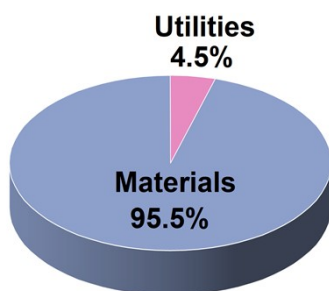

**Figure S15.** Preparation cost proportion of the kilogram-scale catalyst.

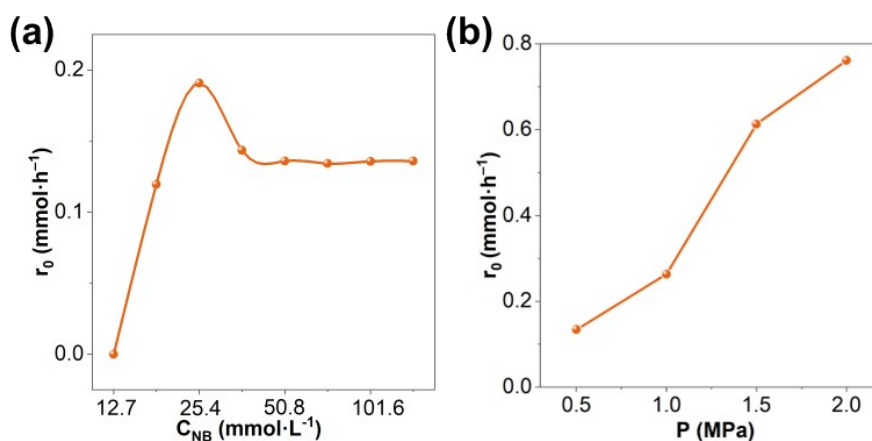

**Figure S16.** Rate-limiting steps in the hydrogenation of nitrobenzene:(a) reaction rate vs. substrate concentration;(b) reaction rate vs. hydrogen pressure.

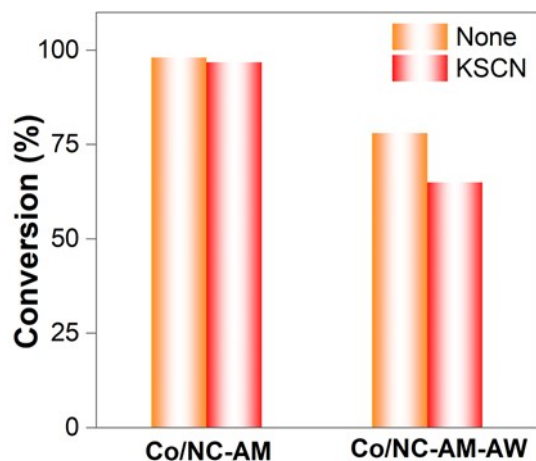

Figure S17. The influence of KSCN on the catalytic performance of Co/NC-AM and Co/NC-AM-AW.

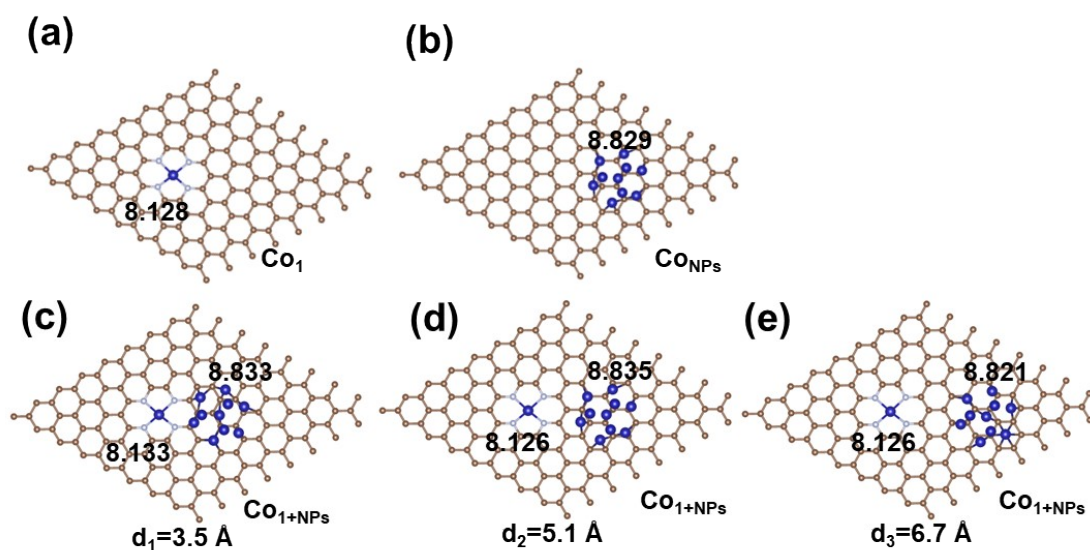

Figure S18. Schematic charge-density distributions for models with varying separations between single-atom sites (Co<sub>1</sub>) and nanoparticles (Co<sub>NPs</sub>). (a) Co<sub>1</sub> site model; (b) Co<sub>NPs</sub> model; (c-e) Co<sub>1+NPs</sub> model with different distance.

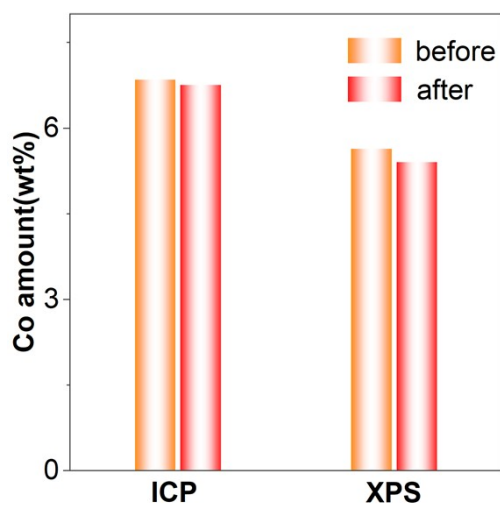

Figure S19. Changes in XPS and ICP of Co/NC-AM before and after ball milling.

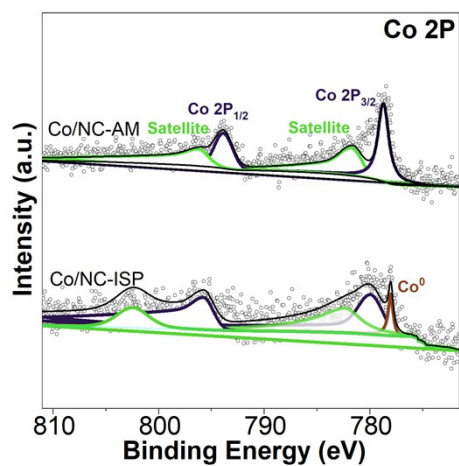

Figure S20. High-resolution Co 2p XPS spectra of the acid-washed Co/NC-AM and Co/NC-ISP catalysts.

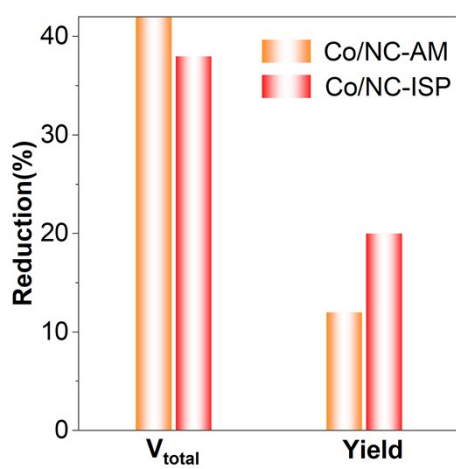

Figure S21. Reduction in catalyst yield and pore volume after cycling.

**Table S1.** Summary of surface areas and pore volumes for all samples.

| Sample               | $S_{\text{BET}}^{\text{a)}}$<br>( $\text{m}^2\cdot\text{g}^{-1}$ ) | $S_{\text{micro}}^{\text{b)}}$<br>( $\text{m}^2\cdot\text{g}^{-1}$ ) | $V_{\text{total}}^{\text{c)}}$<br>( $\text{cm}^3\cdot\text{g}^{-1}$ ) | $V_{\text{micro}}^{\text{d)}}$<br>( $\text{cm}^3\cdot\text{g}^{-1}$ ) |
|----------------------|--------------------------------------------------------------------|----------------------------------------------------------------------|-----------------------------------------------------------------------|-----------------------------------------------------------------------|
| <b>Co/NC-AM</b>      | 1200.00                                                            | 770.00                                                               | 0.94800                                                               | 0.29500                                                               |
| <b>Co/NC-ISP</b>     | 1026.90                                                            | 697.87                                                               | 0.54348                                                               | 0.28118                                                               |
| <b>Co/NC-AM-5th</b>  | 633.97                                                             | 356.01                                                               | 0.54995                                                               | 0.15675                                                               |
| <b>Co/NC-ISP-5th</b> | 539.92                                                             | 387.71                                                               | 0.33615                                                               | 0.14802                                                               |
| <b>Co/NC</b>         | 1001.60                                                            | 772.91                                                               | 0.52342                                                               | 0.27540                                                               |

Note: <sup>a)</sup> Calculated surface area using the BET model; <sup>b)</sup> Cumulative micropore surface using t-Plot model; <sup>c)</sup>  $V_{\text{total}}$ : total volume calculated at  $P/P_0 = 0.99$ ; <sup>d)</sup>  $V_{\text{micro}}$ : micropore volume calculated from t-Plot model.

**Table S2.** Summary of XPS results for all samples.

| Sample           | C     | N    | O    | Co   |
|------------------|-------|------|------|------|
| <b>Co/NC-AM</b>  | 86.96 | 5.81 | 5.99 | 1.24 |
| <b>Co/NC-ISP</b> | 85.50 | 6.54 | 7.10 | 0.87 |
| <b>Co/NC</b>     | 88.44 | 5.43 | 5.52 | 0.60 |

Note: All data are given in atomic%.

**Table S3.** EXAFS fitting parameters at the Fe K-edge for various samples ( $S_0^2 = 1$ ).

| Sample      | Shell | CN    | $R(\text{\AA})$ | $\sigma^2 (10^{-4} \text{\AA}^2)$ | $\Delta E_0(\text{eV})$ | R factor |
|-------------|-------|-------|-----------------|-----------------------------------|-------------------------|----------|
| Co foil     | Co-Co | 12.01 | 2.48            | 0.0024                            | 7.05                    | 0.00072  |
| Co/NC-AM-AW | Co-N  | 3.16  | 1.958           | 0.0074                            | -0.391                  | 0.00721  |

**Table S4.** Catalytic hydrogenation of 1-chlor-4-nitrobenzene over various catalysts under different reaction conditions.

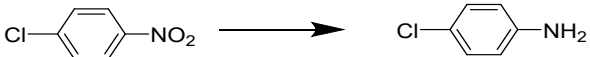

| Entry | Catalyst                                               | T (°C) | H <sub>2</sub> (bar) | Con. (%) | Sel. (%) |
|-------|--------------------------------------------------------|--------|----------------------|----------|----------|
| 1     | Co/NC                                                  | 60     | 5                    | 30       | 0        |
| 2     | Co/NC-AM                                               | 60     | 5                    | 50       | 99.9     |
| 3     | Co/NC- (NH <sub>4</sub> ) <sub>2</sub> CO <sub>3</sub> | 60     | 5                    | 35.5     | 99.9     |
| 4     | Co/NC- NH <sub>4</sub> HCO <sub>3</sub>                | 60     | 5                    | 31.2     | 99.9     |
| 5     | Co/NC- NH <sub>4</sub> Cl                              | 60     | 5                    | 34.7     | 99.9     |
| 6     | Co/NC- NH <sub>4</sub> OAc                             | 60     | 5                    | 42.2     | 99.9     |

Reaction conditions: 1.27mmol substrate; 20mg catal; 0.5ml H<sub>2</sub>O; 9.5ml MeOH; 3 h.

**Table S5.** The Co contents in different samples as a function of etching time were determined by XPS.

| Time(s) | Co contents (Atomic %) <sup>a</sup> |
|---------|-------------------------------------|
| 0       | 0.89                                |
| 20      | 0.57                                |
| 40      | 0.86                                |
| 60      | 0.46                                |

a: The data were obtained for Co/NC-AM-AW by XPS analysis;

**Table S6.** Catalytic hydrogenation of nitrobenzene over our proposed Co<sub>1</sub>/CoNPs@CNT catalysts and recently documented catalysts.

| Catalyst           | Solvent                                              | P <sub>H<sub>2</sub></sub> (Mpa) | T(°C)     | Time(h)  | Con.(%)       | Sel.(%)       | Ratio (mmol/mg) | Ref.                                |
|--------------------|------------------------------------------------------|----------------------------------|-----------|----------|---------------|---------------|-----------------|-------------------------------------|
| <b>Co/NC-AM</b>    | <b>MeOH/H<sub>2</sub>O</b>                           | <b>0.5</b>                       | <b>80</b> | <b>3</b> | <b>&gt;99</b> | <b>&gt;99</b> | <b>1.28/20</b>  | <b>This work</b>                    |
| Co-DABCO-TPA@C-800 | T-BuOH                                               | 4                                | 120       | 2        | 92            | 92            | 0.35/10         | Sci. China Mater., 2017, 60, 1269   |
| Co-N-C             | NaOH/t-BuOH                                          | 3                                | 80        | 1.5      | 97            | 97            | 0.7/20          | Chem. Sci., 2016, 7, 5758           |
| Co@C NPs           | THF                                                  | 0.7                              | 120       | 6        | 93            | 95            | 0.5/30          | J. Catal., 2013, 340, 1             |
| Co/Gs@C            | t-BuOH                                               | 4                                | 120       | 15       | 87            | 87            | 0.5/35          | Nat Protoc., 2015, 15, 1313         |
| Co-PZ-TPA@HAP-800  | PrOH/H <sub>2</sub> O                                | 1                                | 80        | 24       | 95            | 95            | 0.5/50          | ChemCatChem, 2024, 16, e202301027   |
| CoNC/CNT           | MeOH                                                 | 2                                | 110       | 10       | 99.8          | 97.88         | 0.4/20          | Catal. Sci. Technol., 2016, 6, 1007 |
| CoNC/CNT-HCl       | MeOH                                                 | 2                                | 110       | 12       | 100           | 87.78         | 0.4/20          | Catal. Sci. Technol., 2016, 6, 1007 |
| Co/CNT             | fixed bed reactor                                    |                                  | 100       | 2        | 90            | 90            | 0.1/100         | ACS. Catal., 2014, 4, 1478          |
| Co-N-C             | N <sub>2</sub> H <sub>4</sub> ·H <sub>2</sub> O/EtOH | 0.4                              | 80        | 60       | 32.4          | 32.4          | 0.5/10          | Mol. Catal., 2020, 7, 497111226     |

|                                                       |                                                      |     |     |    |      |      |         |                                             |
|-------------------------------------------------------|------------------------------------------------------|-----|-----|----|------|------|---------|---------------------------------------------|
| Co-Co <sub>3</sub> O <sub>4</sub> /NGr@C              | EtOH/H <sub>2</sub> O                                | 2   | 70  | 20 | 96   | 96   | 0.5/5   | Catal. Sci. Technol., 2016, 6, 4473         |
| Co@C-N                                                | N <sub>2</sub> H <sub>4</sub> ·H <sub>2</sub> O/EtOH | 0.1 | 550 | 24 | 100  | 94   | 0.25/20 | ACS Catal., 2013, 5, 1                      |
| 75Co-phen@C-800-8M                                    | i-PrOH                                               | 2   | 90  | 24 | 89   | 89   | 0.5/64  | Chem Catal., 2022, 2, 178                   |
| Co <sub>1</sub> /h-NC                                 | EtOH                                                 | 2   | 120 | 6  | > 99 | > 99 | 0.75/50 | ACS Appl. Mater. Inter., 2020, 12, 17651    |
| Co-0.05M                                              | THF/H <sub>2</sub> O                                 | 2   | 110 | 4  | > 99 | 95   | 0.15/20 | Org. Process Res. Dev., 2016, 20, 452       |
| Co@N <sub>1</sub> Gs-700                              | EtOH                                                 | 2   | 200 | 6  | 99.9 | 94.7 | 0.5/20  | Appl. Catal. B-Environ., 2020, 263, e118339 |
| Co <sub>3</sub> O <sub>4</sub> -Phen@C                | THF/H <sub>2</sub> O                                 | 2.7 | 125 | 24 | 84   | 99   | 0.5/15  | Org. Process Res. Dev., 2018, 22, 430       |
| Co-terephthalic acid-piperazine@SiO <sub>2</sub> -800 | H <sub>2</sub> O                                     | 1   | 50  | 16 | 99   | 94   | 0.5/25  | ChemCatChem, 2022, 14, e202101234           |
| Co-DABCO-TPA@C-800                                    | BuOH                                                 | 4   | 120 | 15 | 90   | 90   | 0.5/25  | Science, 2017, 358, 326                     |
| Zn <sub>4</sub> Co <sub>1</sub> Ox@carbon particles   | THF                                                  | 5   | 70  | 2  | 99   | > 99 | 0.2/30  | Adv. Sci., 2019, 6, 1900807                 |
| Co@C NPs                                              | toluene                                              | 0.4 | 25  | 2  | 100  | > 99 | 1/50    | Chem.Eur.J., 2023, 29, e202203142           |

|                                                        |                       |     |     |     |     |      |         |                                             |
|--------------------------------------------------------|-----------------------|-----|-----|-----|-----|------|---------|---------------------------------------------|
| Co-S-N                                                 | THF/H <sub>2</sub> O  | 5   | 100 | 2   | 99  | 99   | 0.6/62  | Chem. Select., 2020, 5, 7249                |
| CoO <sub>x</sub> @NCNTs                                | EtOH                  | 3   | 110 | 3   | >99 | >99  | 1/40    | ACS Catal., 2015, 5, 4783                   |
| Co-N-C                                                 | HCOOH                 | 3   | 80  | 1.5 | 100 | 97   | 0.2/30  | Appl. Catal. B-Environ., 2018, 227, 386     |
| Co <sub>1</sub> /NPC                                   | EtOH                  | 3   | 110 | 1.5 | >99 | >99  | 1/50    | Nat. Commun., 2022, 13, 723                 |
| CoN <sub>x</sub> -Co <sub>y</sub> ZnS@NPC-Z            | MeOH/H <sub>2</sub> O | 0.5 | 90  | 3   | 100 | 99.9 | 0.25/20 | J. Am. Chem. Soc., 2022, 144, 9280          |
| Co <sub>(6)</sub> -N-C                                 | PhMe                  | 3   | 80  | 3.7 | 96  | 99   | 0.5/50  | Fuel, 2024, 375, 132567.                    |
| Co-N-C@SiO <sub>2</sub>                                | EtOH                  | 4   | 120 | 18  | 100 | >99  | 0.5/40  | ACS Appl. Mater. Inter., 2020, 12, 3624     |
| Co/NPHC                                                | EtOH                  | 1   | 100 | 2   | 100 | >99  | 0.5/10  | Catal. Lett., 2023, 153, 824                |
| Co <sub>1</sub> -N/P-C                                 | EtOH                  | 2   | 100 | 2   | 99  | >90  | 0.5/10  | Appl. Catal. B-Environ., 2024, 346, 123762. |
| Co <sub>3</sub> O <sub>4</sub> /N-Gr/Fe <sub>3</sub> O | EtOH                  | 4   | 120 | 15  | >99 | >99  | 0.5/10  | ACS Appl. Nano. Mater., 2021, 4, 3508       |

|                                    |                       |   |     |     |      |      |          |                                    |
|------------------------------------|-----------------------|---|-----|-----|------|------|----------|------------------------------------|
| Co@NC-800                          | H <sub>2</sub> O      | 1 | 100 | 14  | >99  | >99  | 0.5/30   | Green Chem., 2021, 23, 4490        |
| Co@NC-X                            | PhMe                  | 3 | 80  | 2   | 99   | 99   | 0.5/50   | Sci. China Mater., 2023, 66, 169   |
| Co/Zn <sub>1-1</sub> @NC           | IPA                   | 1 | 100 | 0.5 | >99  | >95  | 0.5/40   | Mol. Catal., 2024, 555, 113911.    |
| NiCo/SBA-16                        | MeOH/H <sub>2</sub> O | 1 | 80  | 3   | 98.7 | 95.9 | 1/10     | ACS Omega., 2023, 8, 12339         |
| TAHCF/Co-N                         | MeOH                  | 2 | 85  | 3   | >99  | >99  | 0.125/10 | Chem. Eng. J., 2024, 490, 151678.  |
| CoCorrPPh <sub>3</sub> @Vulcan-800 | MeOH                  | 4 | 120 | 16  | >99  | >99  | 0.25/12  | ACS Catal., 2022, 12, 11           |
| Co@NCG-800                         | IPA                   | 1 | 100 | 2.5 | 100  | 99   | 1.23/50  | New Carbon Mater., 2023, 38, 555   |
| Co <sub>1</sub> /NPC               | EtOH/H <sub>2</sub> O | 3 | 110 | 3.5 | 100  | >99  | 2/5      | Nat. Commun., 2022, 13, 723        |
| Co/C-PAQ                           | EtOH/H <sub>2</sub> O | 1 | 80  | 2   | >99  | >99  | 0.8/20   | ACS Catal., 2022, 12, 11960        |
| Co-N-CNS-Th                        | EtOH                  | 2 | 100 | 1   | 99   | 99   | 0.5/10   | J. Mater. Chem. A., 2022, 10, 9435 |
| Co@NC/AC-800                       | MeOH                  | 1 | 110 | 4   | 100  | 100  | 1/12     | Cat. Lett., 2023, 153, 1536.       |

|                                                     |                         |      |     |     |     |     |         |                                      |
|-----------------------------------------------------|-------------------------|------|-----|-----|-----|-----|---------|--------------------------------------|
| SA-Co/NSPC                                          | MeOH/H <sub>2</sub> O   | 2    | 120 | 6   | 100 | >99 | 0.5/30  | J. Catal., 2022, 414, 101            |
| Co <sub>1</sub> /NSC-AT                             | H <sub>2</sub> O        | 0.5  | 35  | 3   | >99 | >99 | 0.25/20 | ACS Catal., 2022, 12, 5786           |
| Co-N <sub>x</sub> /C-800-AT                         | H <sub>2</sub> O        | 0.35 | 110 | 1.5 | 100 | >99 | 1/40    | Sci. Adv., 2017, 3, e1601945         |
| CMK-3-CoPc                                          | 2-methyltetrahydrofuran | 2    | 40  | 24  | 100 | >99 | 0.5/30  | Catal. Sci. Technol., 2019, 9, 157   |
| CoN <sub>x</sub> -OMCs                              | H <sub>2</sub> O        | 0.5  | 110 | 1.5 | 100 | >99 | 1/20    | Nanoscale., 2018, 10, 16839          |
| Co/MA-800                                           | THF/H <sub>2</sub> O    | 4    | 120 | 18  | >99 | >99 | 0.5/50  | ACS Appl. Nano Mater., 2020,3, 11070 |
| Co@NMC-800                                          | EtOH                    | 1    | 80  | 1.3 | >99 | >99 | 1/40    | J. Catal., 2017, 348, 212            |
| Co <sub>1</sub> -N/P-C                              | EtOH                    | 2    | 100 | 2   | >99 | >99 | 0.5/10  | Chem. Eur. J., 2018, 24, 4234        |
| CoO <sub>x</sub> @NCNTs                             | EtOH                    | 3    | 110 | 2.5 | >99 | 98  | 1/20    | ACS catal., 2015, 5, 4783            |
| Co-CoO <sub>x</sub> @N-C                            | THF/H <sub>2</sub> O    | 5    | 70  | 2   | >99 | >99 | 0.2/10  | Adv. Sci., 2019, 6, 1900807          |
| Co-Co <sub>3</sub> O <sub>4</sub> @SiO <sub>2</sub> | MeOH                    | 1.5  | 70  | 16  | 95  | 100 | 0.5/25  | ChemCatChem, 2022, 14, 202101234     |

---

**Table S7.** Catalytic hydrogenation of *p*-CNB under various solvent conditions.

| Entry | Catalyst | Solvent                              | T (°C) | H <sub>2</sub> (bar) | t (h) | Con.(%) | Sel.(%) |
|-------|----------|--------------------------------------|--------|----------------------|-------|---------|---------|
| 1     | Co/NC-AM | H <sub>2</sub> O                     | 90     | 10                   | 2     | 67.9    | 46.8    |
| 2     | Co/NC-AM | MeOH                                 | 90     | 10                   | 2     | 31.7    | 99.9    |
| 3     | Co/NC-AM | EtOH                                 | 90     | 10                   | 2     | 43.4    | 99.9    |
| 4     | Co/NC-AM | EA                                   | 90     | 10                   | 2     | 4.8     | 99.9    |
| 5     | Co/NC-AM | EtOH/H <sub>2</sub> O (19/1,<br>V/V) | 90     | 10                   | 2     | 71.3    | 99.9    |
| 6     | Co/NC-AM | MeOH/H <sub>2</sub> O<br>(19/1, V/V) | 90     | 10                   | 2     | 99.9    | 99.9    |
| 7     | Co/NC-AM | THF                                  | 90     | 10                   | 2     | 10      | 99.9    |

Reaction conditions: 0.38 mmol *p*-CNB in 10 mL of solvent by using 20 mg of a catalyst.

**Table S8.** Catalytic hydrogenation of *p*-CNB.

| Entry | Catalyst                    | Con.(%) | Sel.(%) |
|-------|-----------------------------|---------|---------|
| 1     | Co/NC-AM-Ar                 | 50.0    | >99     |
| 2     | Co/NC-AM-N <sub>2</sub>     | 49.5    | >99     |
| 3     | Co/NC-AM-H <sub>2</sub> /Ar | 20.6    | >99     |
| 4     | Co/NC-AM-NH <sub>3</sub>    | 33.5    | >99     |

Reaction conditions: 1.27 mmol substrate; 20 mg catal; 0.5 ml H<sub>2</sub>O; 9.5 ml MeOH; 3 h, 60 °C.

**Table S9.** The Co contents in different samples were determined by ICP.

| Entry | Catalyst                       | Co contents(wt%) |
|-------|--------------------------------|------------------|
| 1     | Co/NC-AM-Ar                    | 6.85             |
| 2     | Co/NC-AM-Ar-AW                 | 1.22             |
| 3     | Co/NC-AM-N <sub>2</sub>        | 6.64%            |
| 4     | Co/NC-AM-N <sub>2</sub> -AW    | 1.23%            |
| 5     | Co/NC-AM-H <sub>2</sub> /Ar    | 8.6%             |
| 6     | Co/NC-AM-H <sub>2</sub> /Ar-AW | 4.3%             |
| 7     | Co/NC-AM-NH <sub>3</sub>       | 10.8%            |
| 8     | Co/NC-AM-NH <sub>3</sub> -AW   | 3.3%             |

**Table S10.** Catalytic Hydrogenation of p-CNB Using Different Hydrogen Sources

| Entry | Hydrogen Sources                 | T (°C) | t (h) | Con.(%) | Sel.(%) |
|-------|----------------------------------|--------|-------|---------|---------|
| 1     | HCOOH                            | 110    | 3     | 76.9    | 99.9    |
| 2     | NaBH <sub>4</sub>                | 110    | 3     | 99.9    | 99.9    |
| 3     | CH <sub>3</sub> OH               | 110    | 3     | 15.8    | 99.9    |
| 4     | C <sub>6</sub> H <sub>8</sub> Si | 110    | 3     | 99.2    | 99.9    |

Reaction conditions:1.26 mmol p-CNB ;20mg catalyst; 0.5ml H<sub>2</sub>O; 9.5ml MeOH.

**Table S11.** The Co contents in different samples were determined by ICP.

| Entry | Catalyst          | Co contents(wt%) |
|-------|-------------------|------------------|
| 1     | fresh catalyst    | 6.85             |
| 2     | recycled catalyst | 6.76             |
